# Supplementary material for: High-resolution and scalable printing of highly conductive PEDOT:PSS for printable electronics
Source: Royal Society of Chemistry journal article supplement (doi:10.1039/d1tc03761g), 2021-01-01
Supplement: d1tc03761g1.pdf [file d1tc03761g1.pdf]

## Supporting Information

### High-Resolution and Scalable Printing of Highly Conductive PEDOT:PSS for Printable Electronics

*Alexander Corletto<sup>ab</sup> and Joseph G. Shapter<sup>a\*</sup>*

<sup>a</sup> Australian Institute for Bioengineering and Nanotechnology, The University of Queensland,  
Brisbane, Queensland 4072, Australia

<sup>b</sup> Department of Chemical Engineering, University of Melbourne, Parkville, Victoria 3010,  
Australia

J. Shapter (Corresponding Author): [j.shapter@uq.edu.au](mailto:j.shapter@uq.edu.au) +61 7 3443 1751

A. Corletto: [alexander.corletto@unimelb.edu.au](mailto:alexander.corletto@unimelb.edu.au)

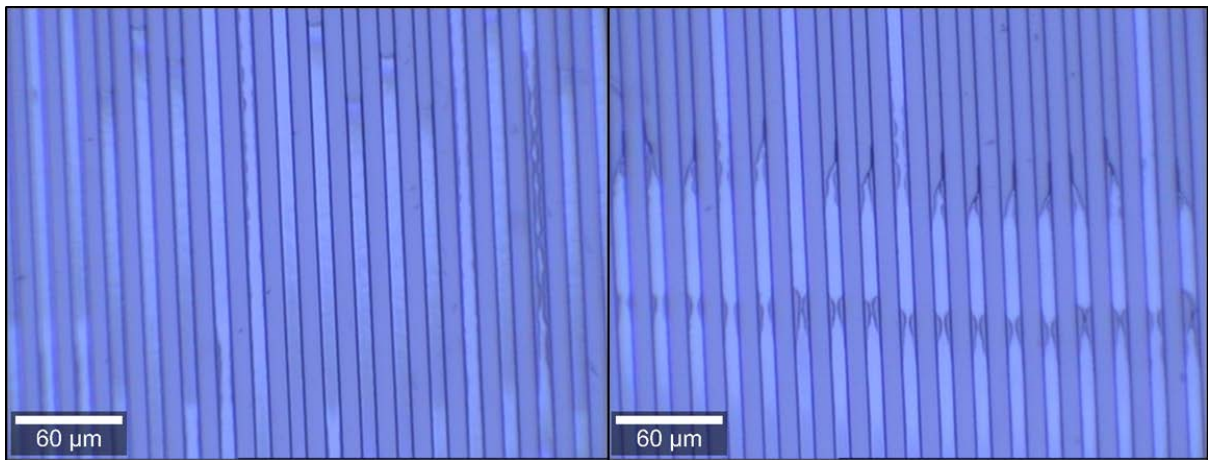

**Figure S1.** Optical microscope image of PEDOT:PSS deposited by TDD non-uniformly in PDMS microchannels with 20  $\mu\text{m}$  pitch using PEDOT:PSS ink dispersion with 50% ethanol and inking speed of  $100 \mu\text{m s}^{-1}$ .

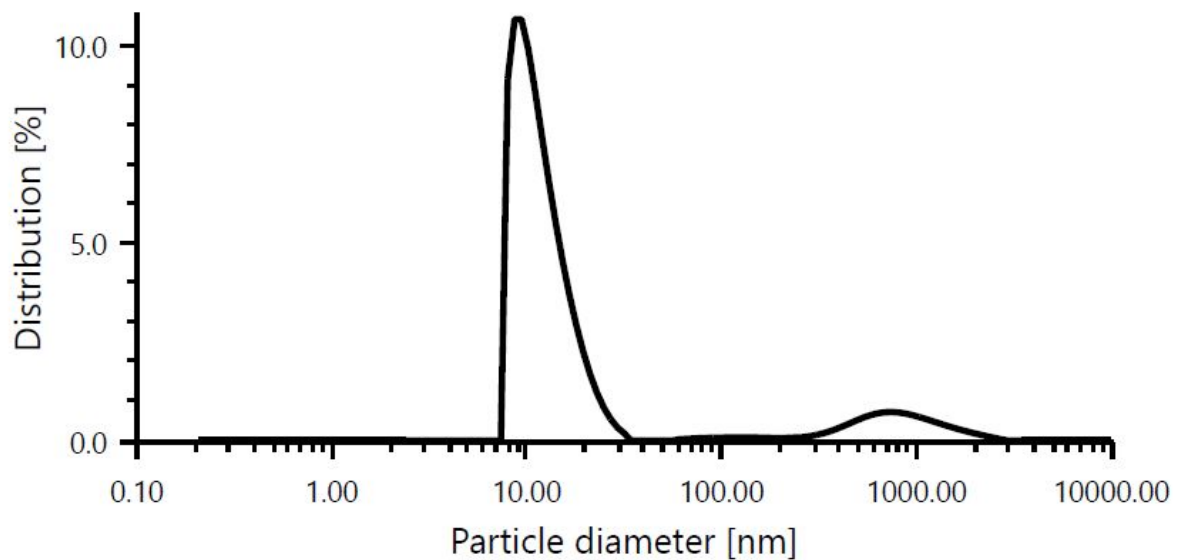

**Figure S2.** Volume-weighted distribution of dispersed PEDOT:PSS particle size in the PEDOT:PSS aqueous dispersion as measured by DLS. The major peak is at 12.2 nm with 2.6 nm standard deviation and 87.1% area and the minor peak is at 885 nm with 416 nm standard deviation and 11.9% area. The major peak is size of the majority volume of PEDOT:PSS particles and the minor peak is the size and distribution of the larger aggregates in the dispersion.

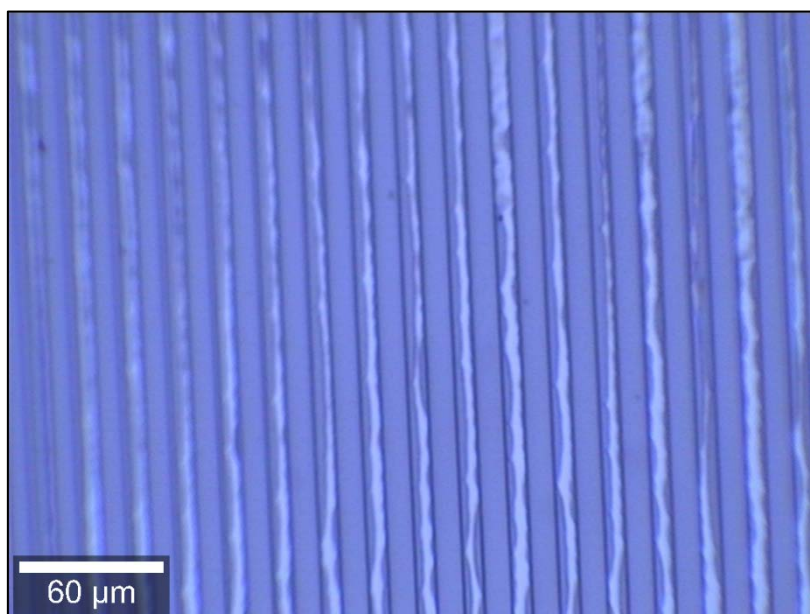

**Figure S3.** Optical microscope image of PEDOT:PSS patterns deposited by TDD in PDMS microchannels with 'wrinkled' edges when using DMSO cosolvent and heat curing.

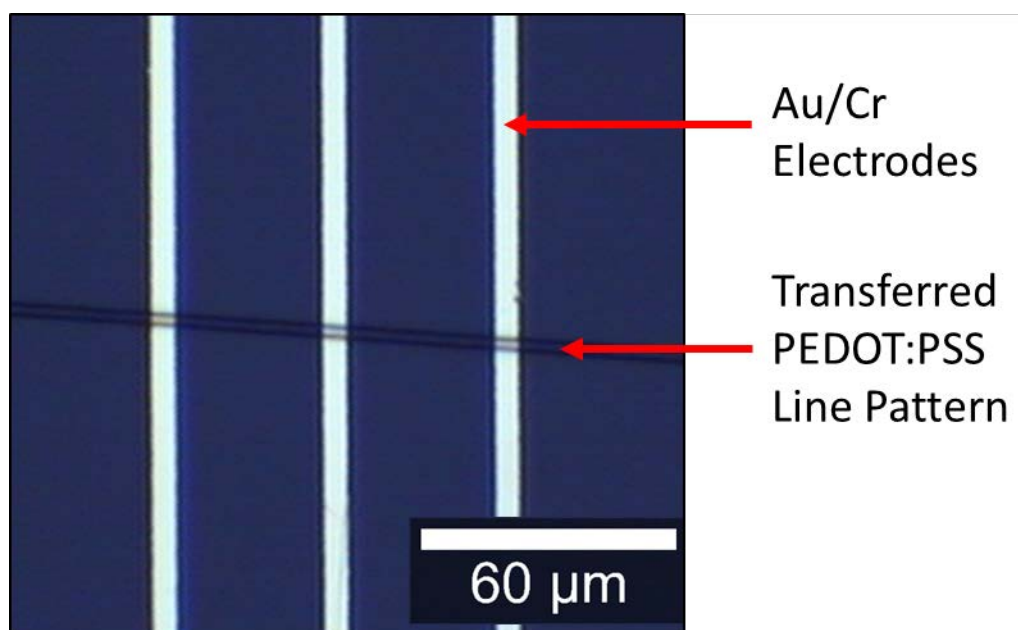

**Figure S4.** Optical microscope image of PEDOT:PSS line pattern transferred over Au/Cr electrodes at a perpendicular orientation for conductivity measurements.
